# Supplementary material for: Surface ozone over the Tibetan Plateau controlled by stratospheric intrusion
Source: Copernicus journal article supplement (doi:10.5194/acp-23-10137-2023), 2023-09-11
Supplement: Supplementary file 1 [file acp-23-10137-2023-supplement.pdf]

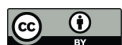

*Supplement of*

## **Surface ozone over the Tibetan Plateau controlled by stratospheric intrusion**

**Xiufeng Yin et al.**

*Correspondence to:* Qiangong Zhang ([qiangong.zhang@itpcas.ac.cn](mailto:qiangong.zhang@itpcas.ac.cn)) and Yuling Hu ([huy1@lzb.ac.cn](mailto:huy1@lzb.ac.cn))

The copyright of individual parts of the supplement might differ from the article licence.

30

31

**Table S1. Locations of the sites over the Tibetan Plateau in this study**

|    | City         | Latitude(N°) | Longitude (E°) | Altitude (m) | Pressure (hPa) |
|----|--------------|--------------|----------------|--------------|----------------|
| 1  | Haixizhou    | 37.3753      | 97.3731        | 2992         | 709            |
| 2  | Haibeizhou   | 36.9639      | 100.9048       | 3115         | 690            |
| 3  | Xining       | 36.63855     | 101.7828       | 2238         | 759            |
| 4  | Haidongzhou  | 36.5067      | 102.0306       | 2140         | 787            |
| 5  | Hainanzhou   | 36.2866      | 100.6188       | 2865         | 722            |
| 6  | Huangnanzhou | 35.5102      | 102.0199       | 2480         | 754            |
| 7  | Guoluozhou   | 34.4714      | 100.2561       | 3755         | 647            |
| 8  | Nagqu        | 31.48215     | 92.05815       | 4505         | 587            |
| 9  | Changdu      | 31.1266      | 97.18065       | 3244         | 681            |
| 10 | Lhasa        | 29.652       | 91.097         | 3650         | 650            |
| 11 | Nyingchi     | 29.6504      | 94.36485       | 2993         | 711            |
| 12 | Shigatse     | 29.25415     | 88.89035       | 3840         | 638            |
| 13 | Shannan      | 29.24615     | 91.7657        | 3559         | 663            |

32

33

34

35

36

37

38

39

40

41

42

43

44

45

46

47

48

49

50

51

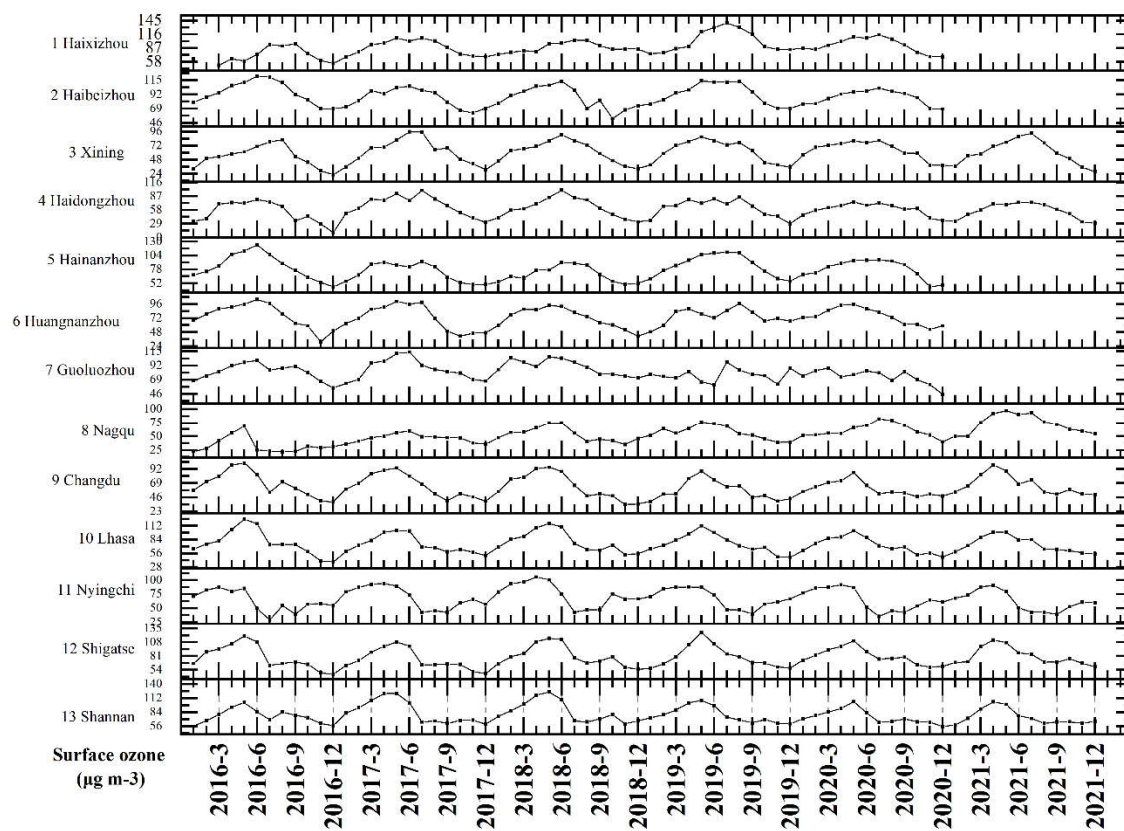

53

54

Fig. S1 Month to month variation of surface ozone at 13 sites over the Tibetan Plateau during 2016 to 2021

55

56

57

58

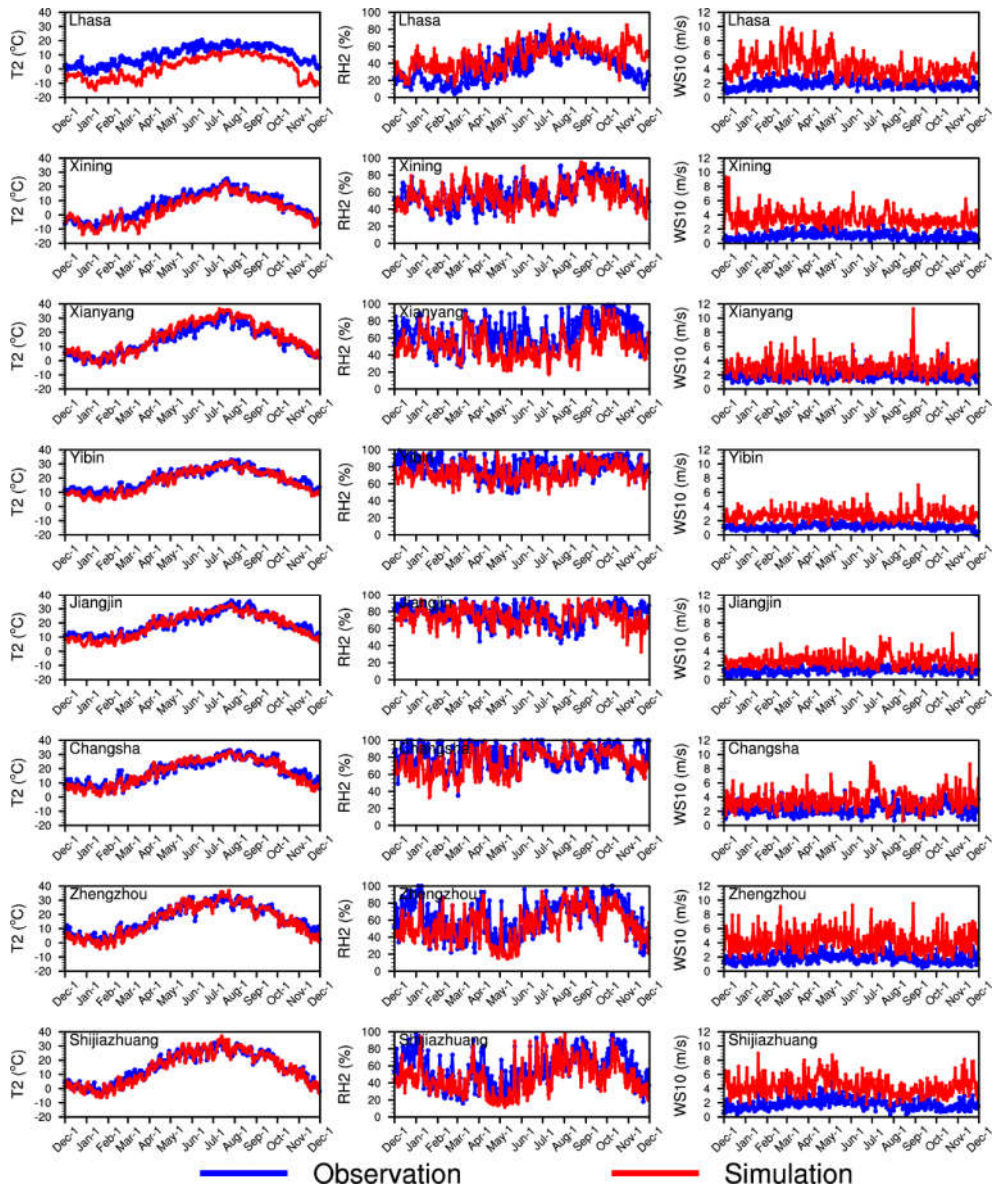

59

60

61

62

Fig. S2 Comparisons of T2, RH2, and WS10 between WRF-chem simulation and observation

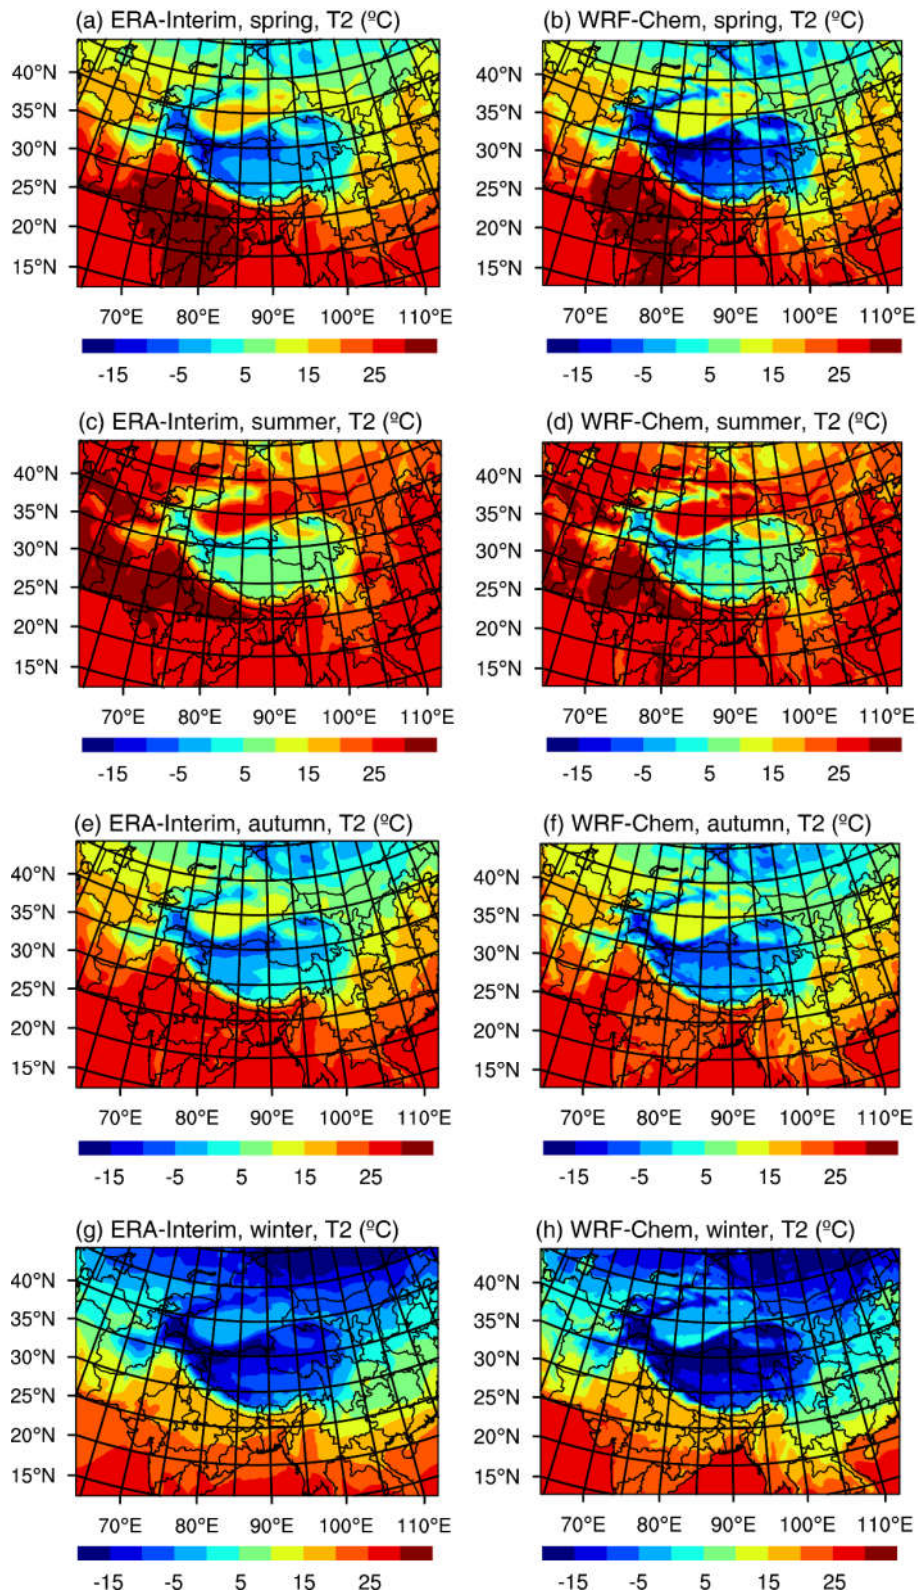

Fig. S3 Comparisons of seasonal mean T2 between WRF-chem simulation and observation

63  
64  
65

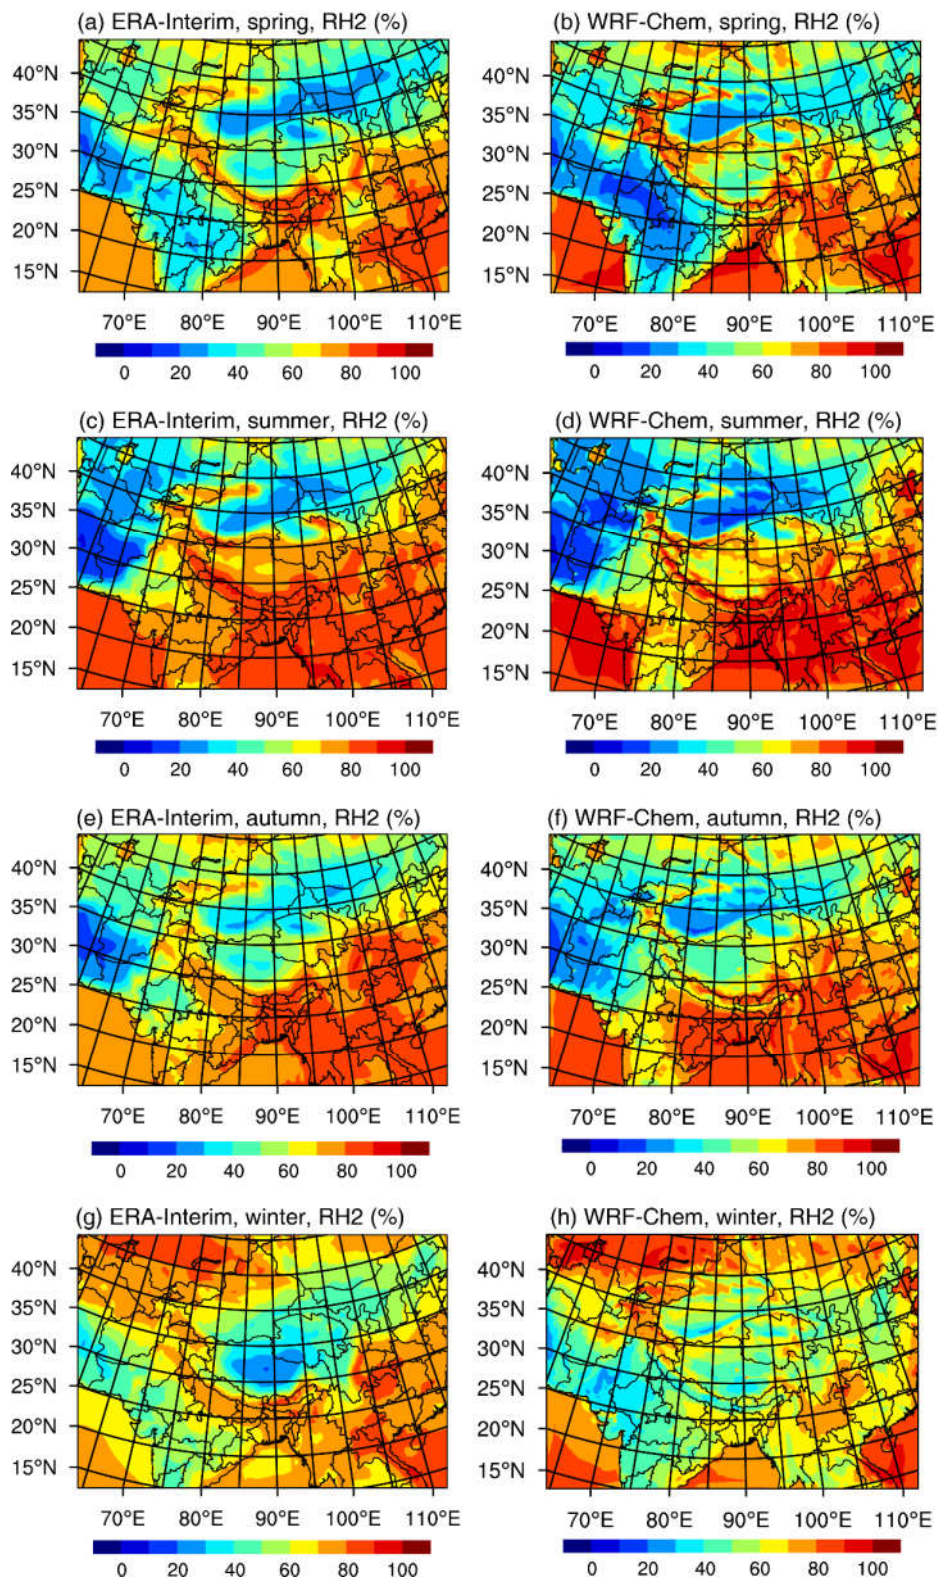

Fig. S4 Comparisons of seasonal mean RH2 between WRF-chem simulation and observation

66

67

68

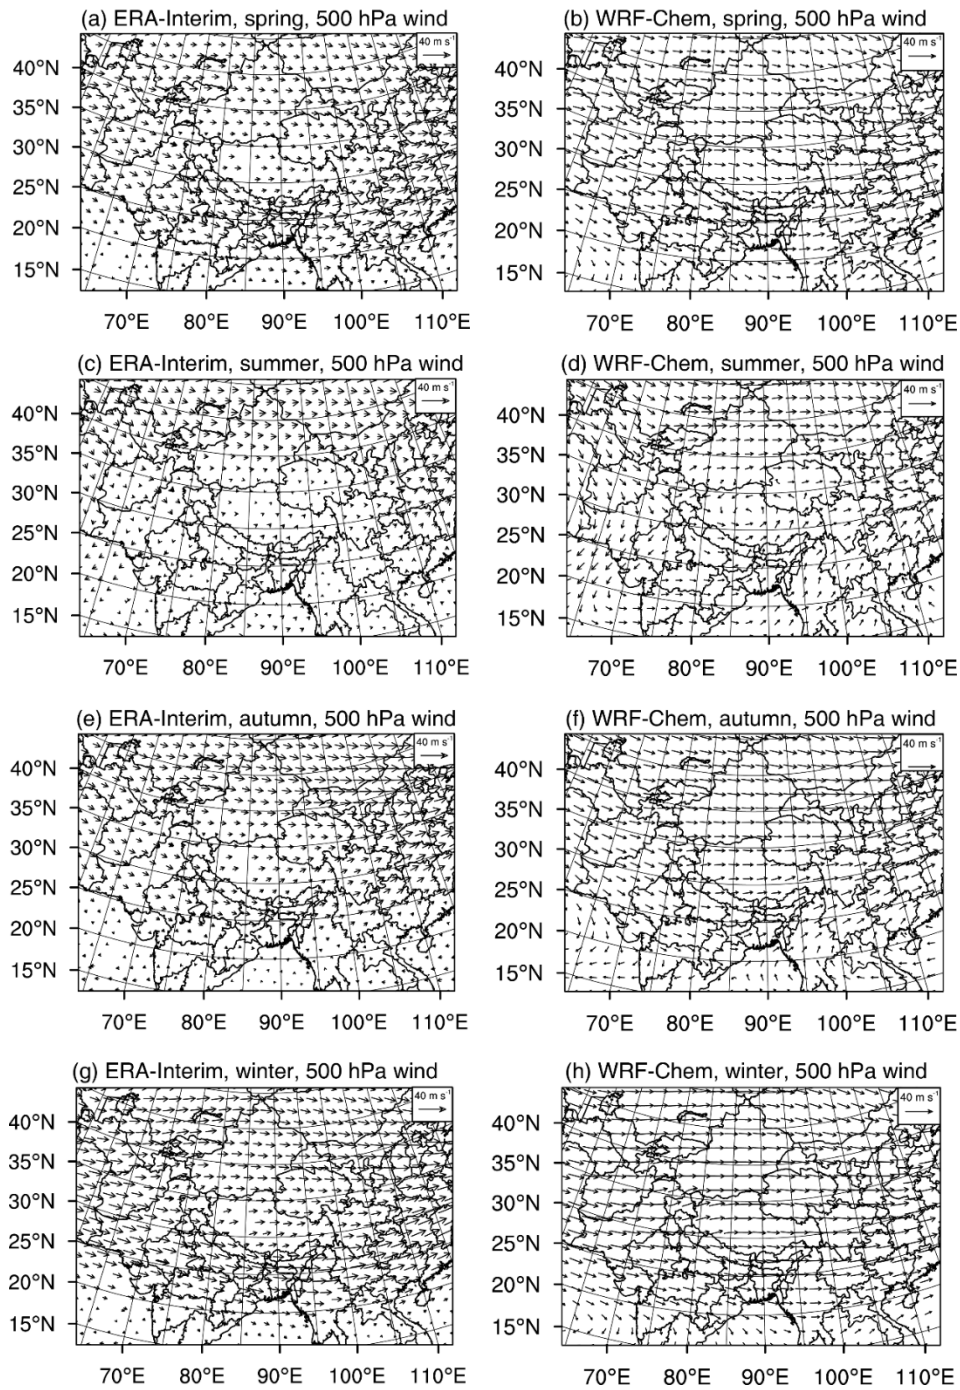

69

70

Fig. S5 Comparisons of seasonal mean wind at 500hPa between WRF-chem simulation and observation

71

72

73

74

75

76

77

78

79

80

81

82

83

84

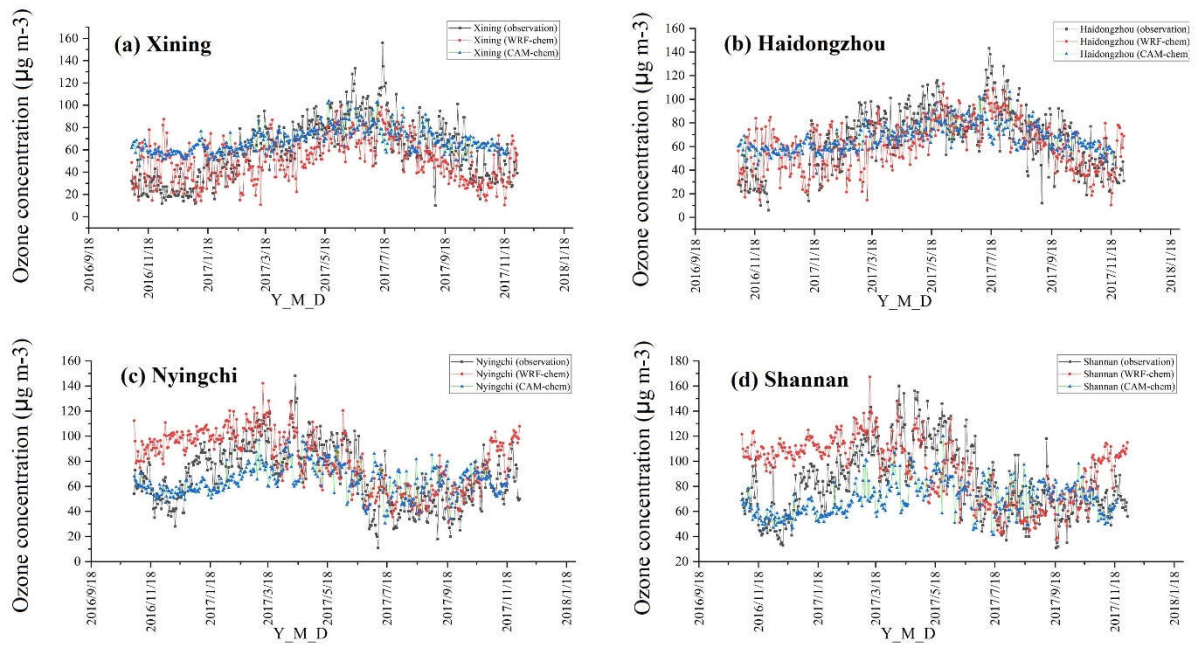

85

86

87

88

89

Fig. S6 Comparisons of surface ozone concentrations between WRF-chem simulation, CAM-chem simulation and observation
